# Supplementary material for: Experimental and computational studies on copper–cerium catalysts supported on nitrogen-doped porous carbon for preferential oxidation of CO
Source: Royal Society of Chemistry journal article supplement (doi:10.1039/c9cy00446g), 2019-01-01
Supplement: c9cy00446g1.pdf [file c9cy00446g1.pdf]

## Supporting Information

# Experimental and Computational Studies on Copper-Cerium Catalysts Supported on Nitrogen-Doped Porous Carbon for Preferential Oxidation of CO

Qi Wang<sup>&,a</sup>, Hao Zhang<sup>&,a</sup>, Jinfang Wu<sup>\*,a</sup>, Naren Tuya<sup>a</sup>, Yuansong Zhao<sup>a</sup>, Shangpeng Liu<sup>a</sup>, Yajun Dong<sup>a</sup>, Ping Li<sup>\*,b</sup>, Yiming Xu<sup>b</sup> and Shanghong Zeng<sup>\*,a</sup>

<sup>a</sup> Inner Mongolia Key Laboratory of Chemistry and Physics of Rare Earth Materials, School of Chemistry and Chemical Engineering, Inner Mongolia University, Hohhot 010021, China

<sup>b</sup> State Key Laboratory of High-efficiency Coal Utilization and Green Chemical Engineering, School of Chemistry and Chemical Engineering, Ningxia University, Yinchuan 750021, China  
(\* These authors contributed equally to this work and should be considered co-first authors)

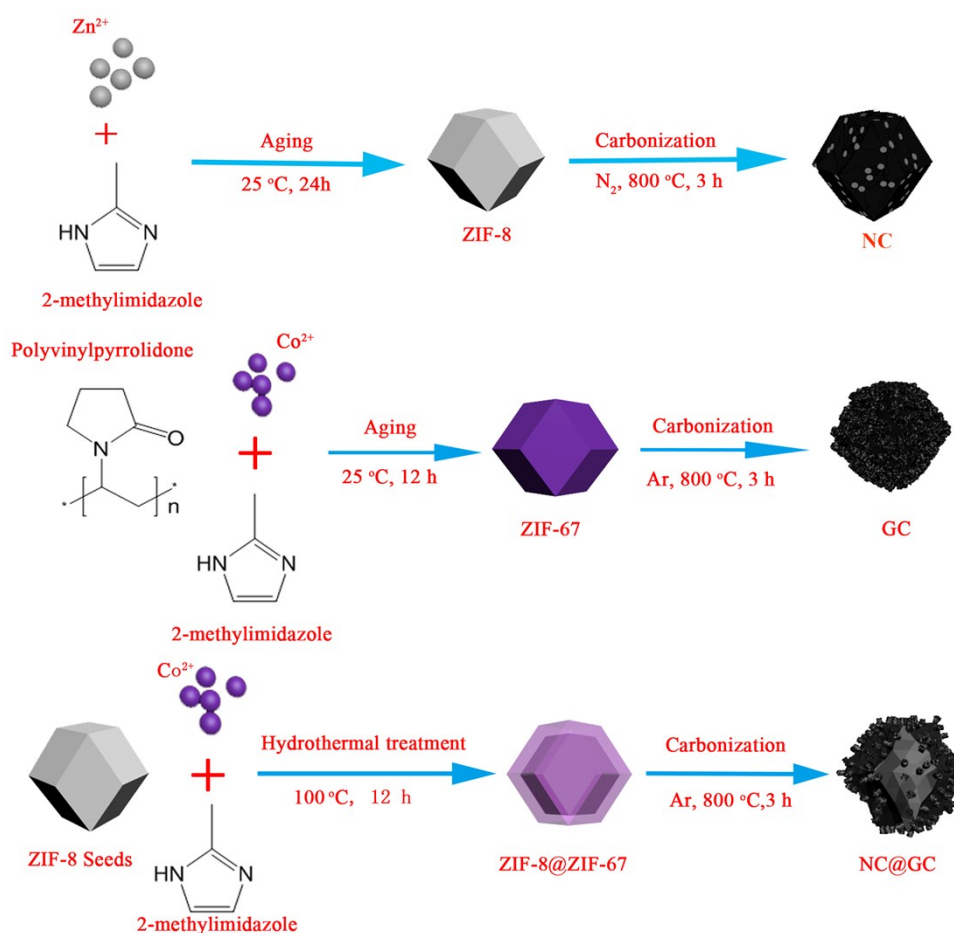

Scheme 1. Schematic synthesis processes of the NC, GC and NC@GC supports.

**Table S1 Structural and textural properties of the supports.**

| Support | I <sub>D</sub> /I <sub>G</sub> | S <sub>BET</sub> (m <sup>2</sup> /g) |
|---------|--------------------------------|--------------------------------------|
| NC      | 1.11                           | 694.57                               |
| GC      | 1.08                           | 261.61                               |
| NC@GC   | 1.08                           | 360.06                               |

**Table S2 Comparison of catalytic performance over the CuCe/NC, CuCe/GC, CuCe/NC@GC and reported copper-cerium oxide catalysts for CO-PROX**

| Catalysts                                                  | Operating conditions                                                  | Space velocity<br>(mL·g <sub>cat</sub> <sup>-1</sup> ·h <sup>-1</sup> ) | T <sub>50</sub> <sup>a</sup> (°C) | T <sub>100</sub> <sup>b</sup> (°C) | CO <sub>2</sub> -selectivity<br>at T <sub>100</sub> (%) | Width <sup>c</sup> | Ref.      |
|------------------------------------------------------------|-----------------------------------------------------------------------|-------------------------------------------------------------------------|-----------------------------------|------------------------------------|---------------------------------------------------------|--------------------|-----------|
| CuCe/NC                                                    | 1% CO, 1% O <sub>2</sub> , 50% H <sub>2</sub> in N <sub>2</sub>       | 40,000                                                                  | 76                                | 115                                | 71                                                      | 80                 | This work |
| CuCe/GC                                                    | 1% CO, 1% O <sub>2</sub> , 50% H <sub>2</sub> in N <sub>2</sub> .     | 40,000                                                                  | 112                               | 155                                | 53                                                      | 40                 | This work |
| CuCe/NC@GC                                                 | 1% CO, 1% O <sub>2</sub> , 50% H <sub>2</sub> in N <sub>2</sub> .     | 40,000                                                                  | 105                               | 135                                | 83                                                      | 60                 | This work |
| CuO <sub>x</sub> /CeO <sub>2</sub> -RGO                    | 1% CO, 1.25% O <sub>2</sub> , 50% H <sub>2</sub> in He.               | 80,000                                                                  | 88                                | 135                                | 64                                                      | 60                 | [4]       |
| CuCe-S                                                     | 0.5% CO, 0.9% O <sub>2</sub> , 50% H <sub>2</sub> in N <sub>2</sub> . | 66,667                                                                  | 86                                | 145                                | 70                                                      | 20                 | [9]       |
| Cu <sub>x</sub> O-CeO <sub>2</sub> /HPC-B                  | 1% CO, 1% O <sub>2</sub> , 50% H <sub>2</sub> in N <sub>2</sub> .     | 40,000                                                                  | 80                                | 115                                | 81                                                      | 80                 | [18]      |
| Cu <sub>0.3</sub> Ce <sub>0.7</sub> O <sub>2</sub> -650 °C | 1% CO, 1% O <sub>2</sub> , 50% H <sub>2</sub> in N <sub>2</sub>       | 60,000                                                                  | 70                                | 115                                | 73                                                      | 55                 | [S1]      |
| CuCeO-ETH                                                  | 1% CO, 1% O <sub>2</sub> , 50% H <sub>2</sub> in Ar .                 | 18,000                                                                  | 73                                | 100                                | 100                                                     | 95                 | [S2]      |
| Cu <sub>2.5</sub> Ce <sub>7.5</sub>                        | 1% CO, 1% O <sub>2</sub> , 50% H <sub>2</sub> in N <sub>2</sub> .     | 20,000                                                                  | 55                                | 95                                 | 90                                                      | 120                | [S3]      |
| CuCe                                                       | 1% CO, 1% O <sub>2</sub> , 60% H <sub>2</sub> in He.                  | 12,0000                                                                 | 98                                | 155                                | 55                                                      | 45                 | [S4]      |
| Cu(K)/CeO <sub>2</sub> CNT                                 | 1% CO, 1% O <sub>2</sub> , 50% H <sub>2</sub> in He.                  | 12,0000                                                                 | 112                               | 175                                | 70                                                      | 25                 | [S5]      |

T<sub>50</sub><sup>a</sup>: Temperature at 50% CO conversion; T<sub>100</sub><sup>b</sup>: Temperature at 100% CO conversion; Width<sup>c</sup>: Width of temperature window (CO conversion > 99.0%)

[S1] X. Gong, W. W. Wang, X. P. Fu, S. Wei, W. Z. Yu, B. C. Liu, C. J. Jia, J. Zhang, *Fuel*, 2018, 229, 217-226.

[S2] X. D. Zhang, X. L. Zhang, L. Song, F. L. Hou, Y. Q. Yang, Y. X. Wang, N. Liu, *Int. J. Hydrogen Energ.*, 2018, 43, 18279-18288.

[S3] T. Y. Kou, C. H. Si, J. Pinto, C. Y. Ma, Z. H. Zhang, *Nanoscale*, 2017, 9, 8007-2014.

[S4] J. L. Ayastuy, E. FernándeZ-Puertas, M. P. González-Marcos and M. A. Gutiérrez-Ortiz, *Int. J. Hydrog. Energy*, 2012, **37**, 73-85.

[S5] A. B. Dongil, B. Bachiller-Baeza, E. Castillejos, N. Escalona, A. Guerrero-Ruiz, I. Rodríguez-Ramos, *Catal. Today*, 2018, 301, 141-146.

**Table S3 N content for the fresh and used CuCe/NC-400 catalysts**

| <b>Catalysts</b> | <b>Pyridine-N (%)</b> | <b>N content</b> |
|------------------|-----------------------|------------------|
| fresh-CuCe/NC    | 74.00                 | 5.56             |
| used-CuCe/NC     | 62.04                 | 1.72             |

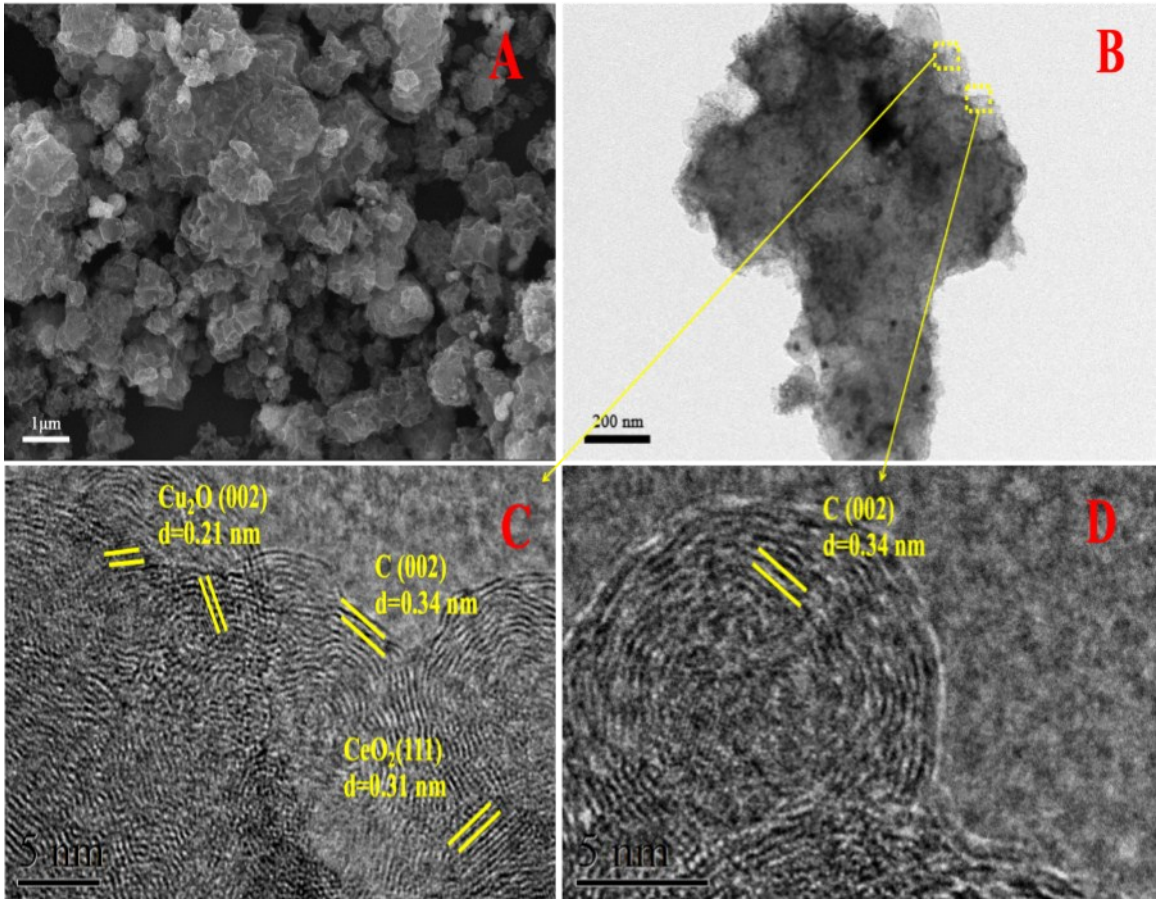

**Fig. S1 SEM and TEM images of the CuCe/NC@GC catalyst.**

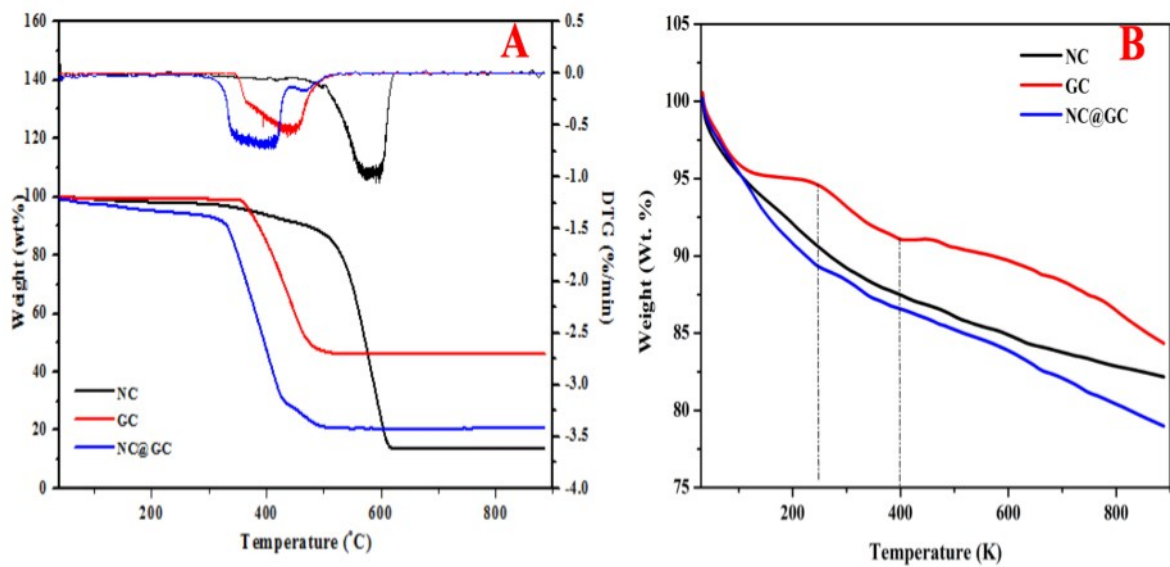

**Fig. S2** TG curves of the carbon supports in (A) air and (B) N<sub>2</sub> atmosphere.

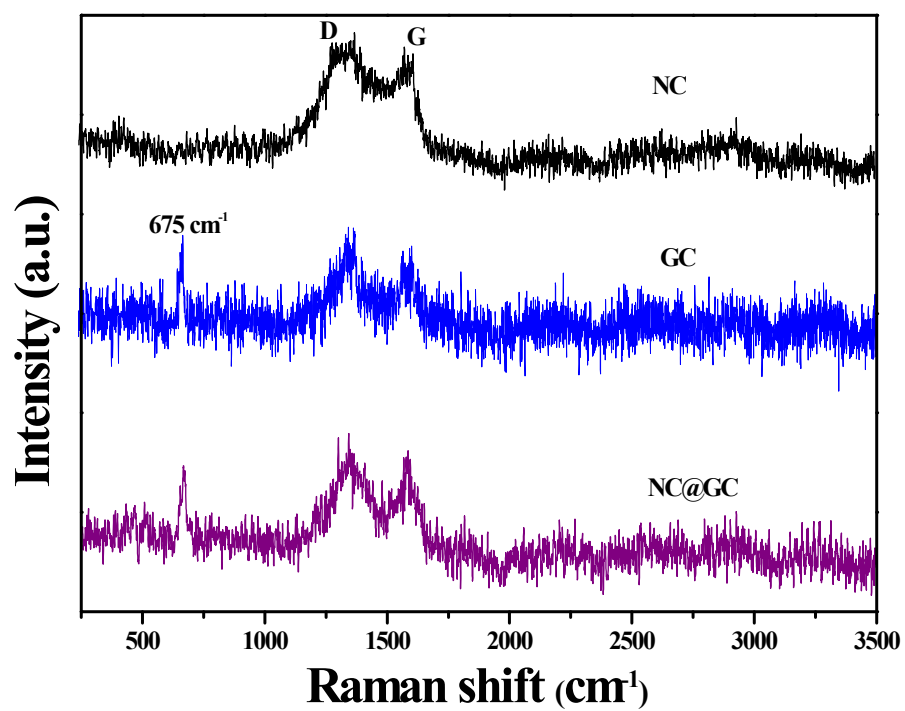

Fig. S3 Raman spectra of the supports.

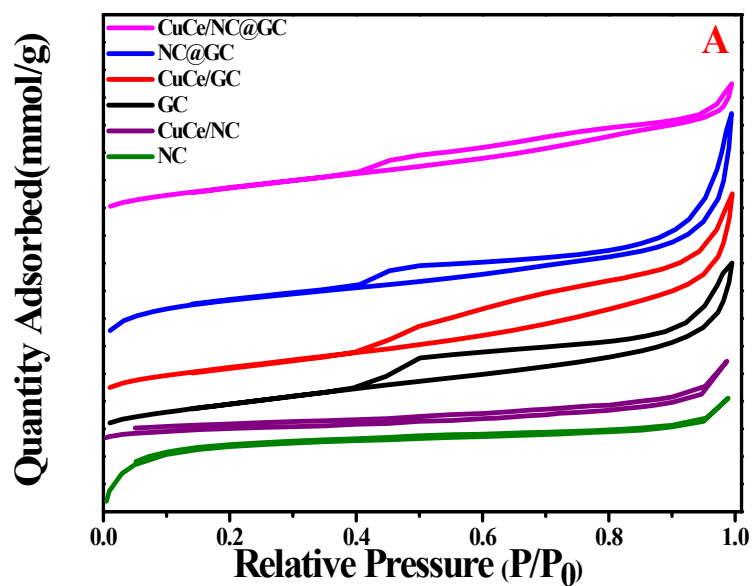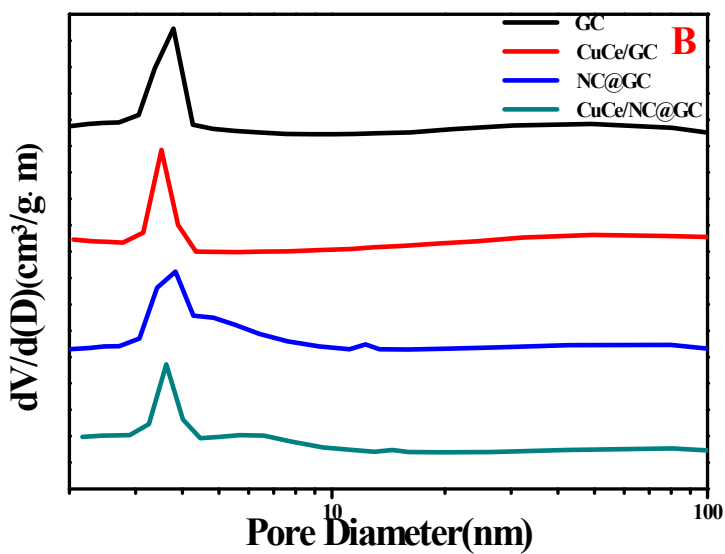

Fig. S4 (A)  $N_2$  adsorption-desorption isotherms and (B) BJH pore size distribution curves of the supports and catalysts.



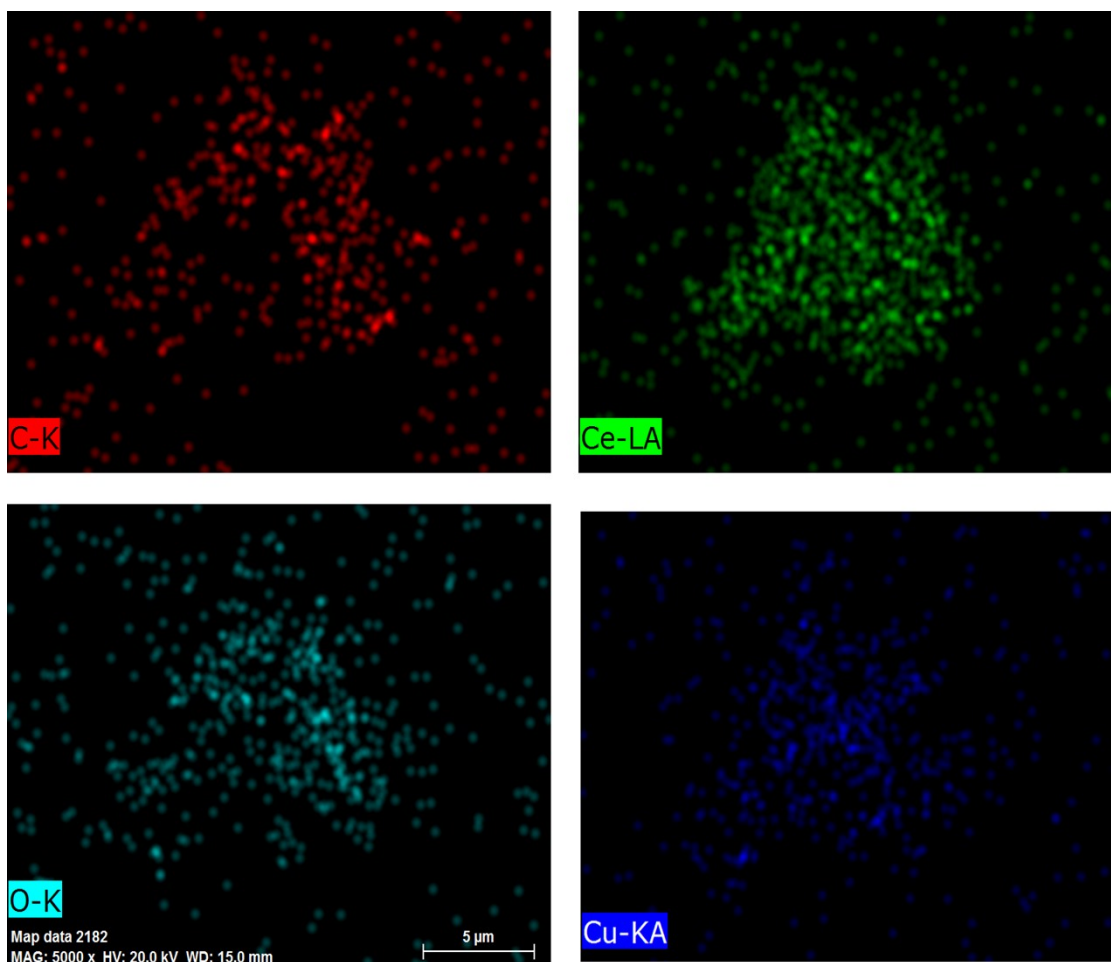

**Fig. S5 EDS mapping images of the CuCe/NC-400 catalyst.**

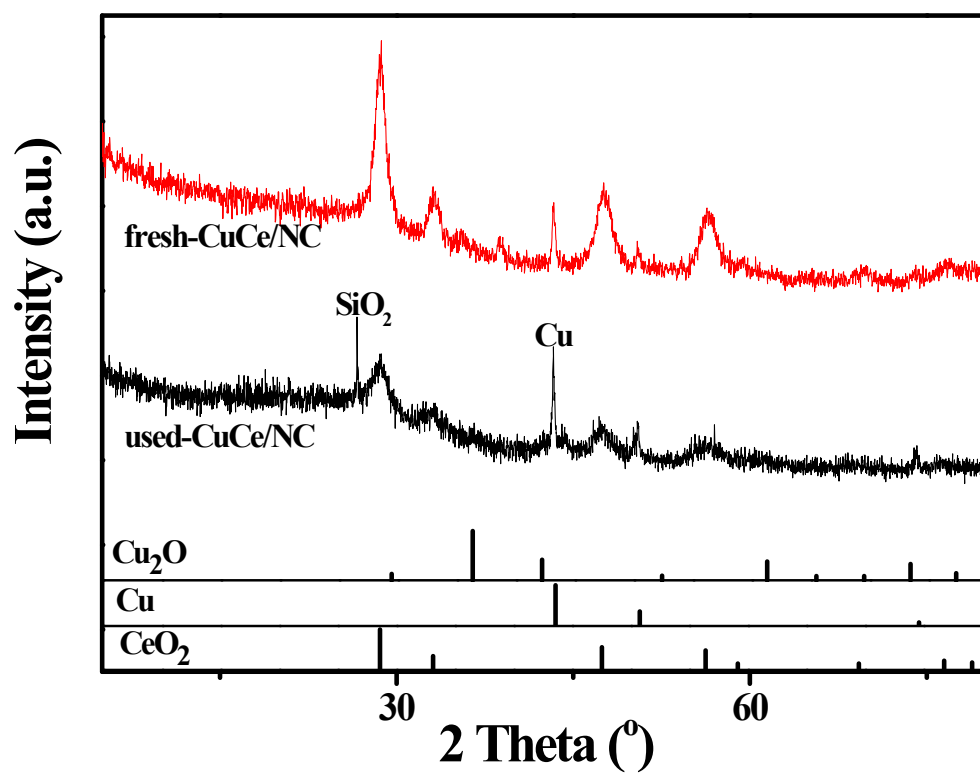

Fig. S6 XRD patterns of the fresh and used CuCe/NC-400 catalysts

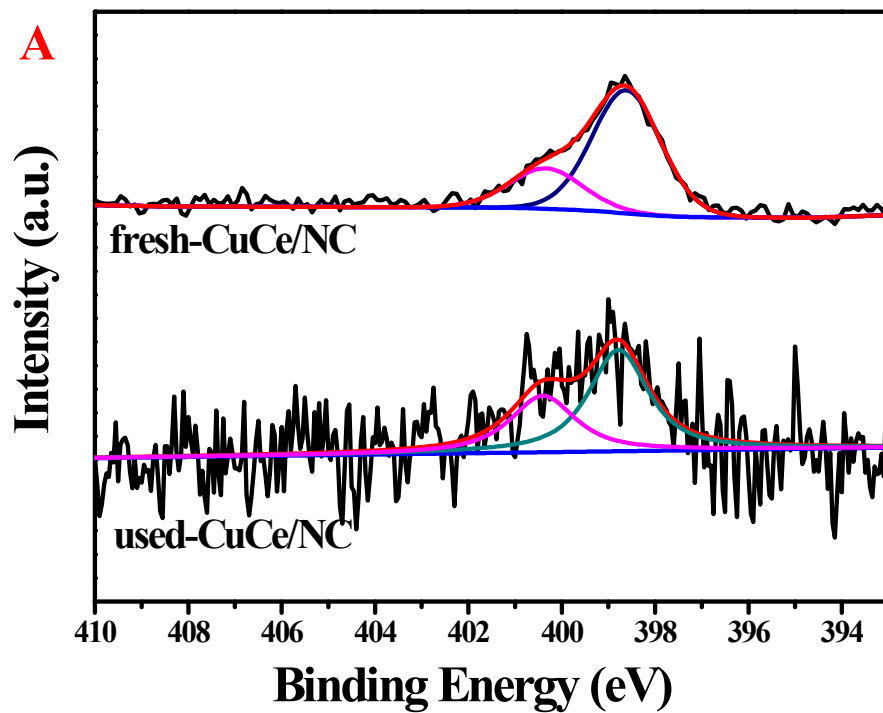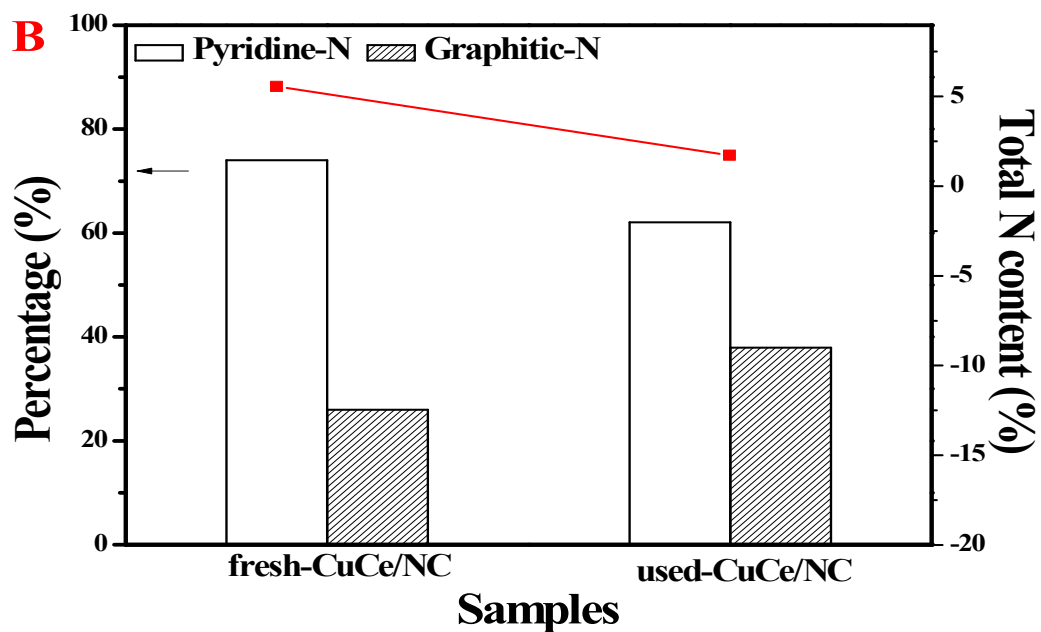

Fig. S7 XPS spectra and analyses of N content for the fresh and used CuCe/NC-400 catalysts
